# Supplementary material for: Discovery of a potent and dual-selective bisubstrate inhibitor for protein arginine methyltransferase 4/5
Source: PubMed Central journal article supplement — Acta Pharm Sin B. 2020 Oct 16;11(9):2709–18. doi: 10.1016/j.apsb.2020.10.013 (PMC8463262; doi:10.1016/j.apsb.2020.10.013), 2020-10-16

**Supporting Information for**

**Original article**

**Discovery of a potent and dual-selective bisubstrate inhibitor for protein arginine methyltransferase 4/5**

Ayad A. Al-Hamashi<sup>a,b</sup>, Dongxing Chen<sup>a</sup>, Youchao Deng<sup>a</sup>, Guangping Dong<sup>a</sup>, Rong Huang<sup>a,\*</sup>

<sup>a</sup>*Department of Medicinal Chemistry and Molecular Pharmacology, Center for Cancer*

*Research, Institute for Drug Discovery, Purdue University, West Lafayette IN 47907, USA*

<sup>b</sup>*Department of Pharmaceutical Chemistry, College of Pharmacy, University of Baghdad, Bab-almoadham, Baghdad 10047, Iraq*

Received 5 September 2020; received in revised form 27 September 2020; accepted 13 October 2020

\*Corresponding author. Tel: +1 765 4943426.

E-mail address: [huang-r@purdue.edu](mailto:huang-r@purdue.edu) (Rong Huang).

## Table of contents

**Table S1** The single dose of HotSpot methyltransferases inhibition for a single dose (10  $\mu\text{mol/L}$ ) of AH237 on various methyltransferases. These data are associated with Fig. 3. 3

|                                                                                                                                                                                                                      |    |
|----------------------------------------------------------------------------------------------------------------------------------------------------------------------------------------------------------------------|----|
| <b><math>^1\text{H}</math> NMR and <math>^{13}\text{C}</math> NMR Spectra</b> .....                                                                                                                                  | 4  |
| <i>S</i> -(((3 <i>aS</i> ,4 <i>S</i> ,6 <i>R</i> ,6 <i>aR</i> )-6-(6-Amino-9 <i>H</i> -purin-9-yl)-2,2-dimethyltetrahydrofuro[3,4- <i>d</i> ][1,3]dioxol-4-yl)methyl) ethanethioate ( <b>2</b> ) .....               | 4  |
| 2-(2-(((3 <i>aS</i> ,4 <i>S</i> ,6 <i>R</i> ,6 <i>aR</i> )-6-(6-Amino-9 <i>H</i> -purin-9-yl)-2,2-dimethyltetrahydrofuro[3,4- <i>d</i> ][1,3]dioxol-4-yl)methyl)thio)ethyl)isoindoline-1,3-dione ( <b>4a</b> ) ..... | 5  |
| 2-(3-(((3 <i>aS</i> ,4 <i>S</i> ,6 <i>R</i> ,6 <i>aR</i> )-6-(6-Amino-9 <i>H</i> -purin-9-yl)-2,2-dimethyltetrahydrofuro[3,4- <i>d</i> ][1,3]dioxol-4-yl)methyl)thio)propyl)isoindoline-1,3-dione ( <b>4b</b> )..... | 5  |
| <b>MALDI Spectra</b> .....                                                                                                                                                                                           | 6  |
| AH240 ( <b>1b</b> ) (Lys-C2-Ad). .....                                                                                                                                                                               | 6  |
| AH244 ( <b>1f</b> ) (Lys-C3-Ad). .....                                                                                                                                                                               | 7  |
| AH238 ( <b>1a</b> ) (Arg-C2-Ad). .....                                                                                                                                                                               | 8  |
| AH246 ( <b>1e</b> ) (Arg-C3-Ad).....                                                                                                                                                                                 | 9  |
| AH218 ( <b>1d</b> ) (RGK-C2-Ad).....                                                                                                                                                                                 | 10 |
| AH221 ( <b>1h</b> ) (RGK-C3-Ad).....                                                                                                                                                                                 | 11 |
| AH233 ( <b>1c</b> ) (RGR-C2-Ad).....                                                                                                                                                                                 | 12 |
| AH237 ( <b>1g</b> ) (RGR-C3-Ad). .....                                                                                                                                                                               | 13 |

**Table S1** The single dose of HotSpot methyltransferases inhibition for a single dose (10  $\mu$ mol/L) of AH237 on various methyltransferases. These data are associated with Fig. 3.

| Methyltransferase      | % Enzyme activity* | Methyltransferase              | % Enzyme activity* |
|------------------------|--------------------|--------------------------------|--------------------|
| ASH1L                  | 100.10             | NSD2 (E1099K)                  | 107.95             |
| DNMT1                  | 94.27              | NSD2 (T1150A)                  | 108.71             |
| DNMT3a                 | 86.34              | NSD3                           | 102.65             |
| DNMT3b                 | 88.39              | PRDM9                          | 110.83             |
| DNMT3b/3L              | 103.47             | PRMT1                          | 28.96              |
| DOT1L                  | 74.89              | PRMT3                          | 100.72             |
| EZH1 Complex           | 92.13              | PRMT4                          | 0.28               |
| EZH2 Complex           | 97.83              | PRMT5/MEP50 Complex            | 0.20               |
| EZH2(Y641F)<br>Complex | 95.23              | PRMT5 (C449S)/MEP50<br>Complex | 0.70               |
| G9a                    | 88.07              | PRMT6                          | 41.59              |
| GLP                    | 103.64             | PRMT7                          | 25.08              |
| METTL21A               | 97.44              | PRMT8                          | 59.64              |
| MLL1 Complex           | 111.76             | SET1b Complex                  | 96.84              |
| MLL2 Complex           | 110.15             | SET7/9                         | 110.28             |
| MLL3 Complex           | 102.61             | SET8                           | 99.68              |
| MLL4 Complex           | 97.85              | SETD2                          | 91.70              |
| NTMT1                  | 102.22             | SMYD2                          | 50.67              |
| NTMT2                  | 91.14              | SMYD3                          | 50.28              |
| NSD1                   | 85.71              | SUV39H1                        | 100.32             |
| NSD2                   | 101.46             | SUV39H2                        | 100.12             |
|                        |                    | SUV420H1TV2                    | 96.69              |

\*Relative to DMSO control.

# $^1\text{H}$ NMR and $^{13}\text{C}$ NMR spectra

*S*-(((3*aS*,4*S*,6*R*,6*aR*)-6-(6-Amino-9*H*-purin-9-yl)-2,2-dimethyltetrahydrofuro[3,4-*d*][1,3]dioxol-4-yl)methyl) ethanethioate (**2**)

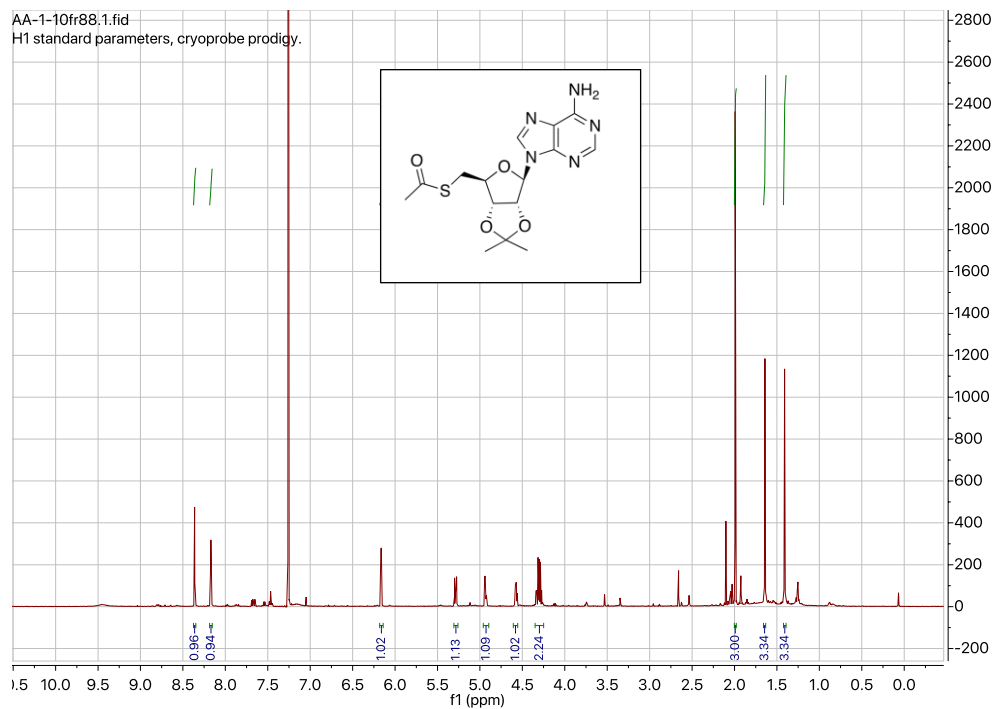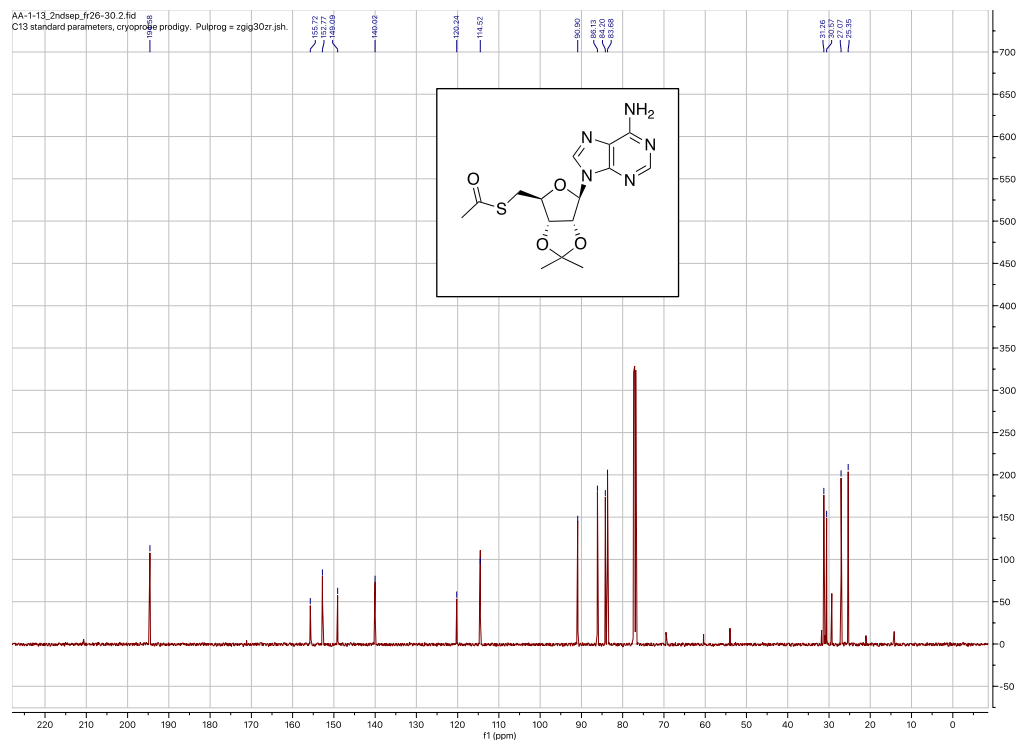



# MALDI spectra

AH240 (1b) (Lys-C2-Ad).

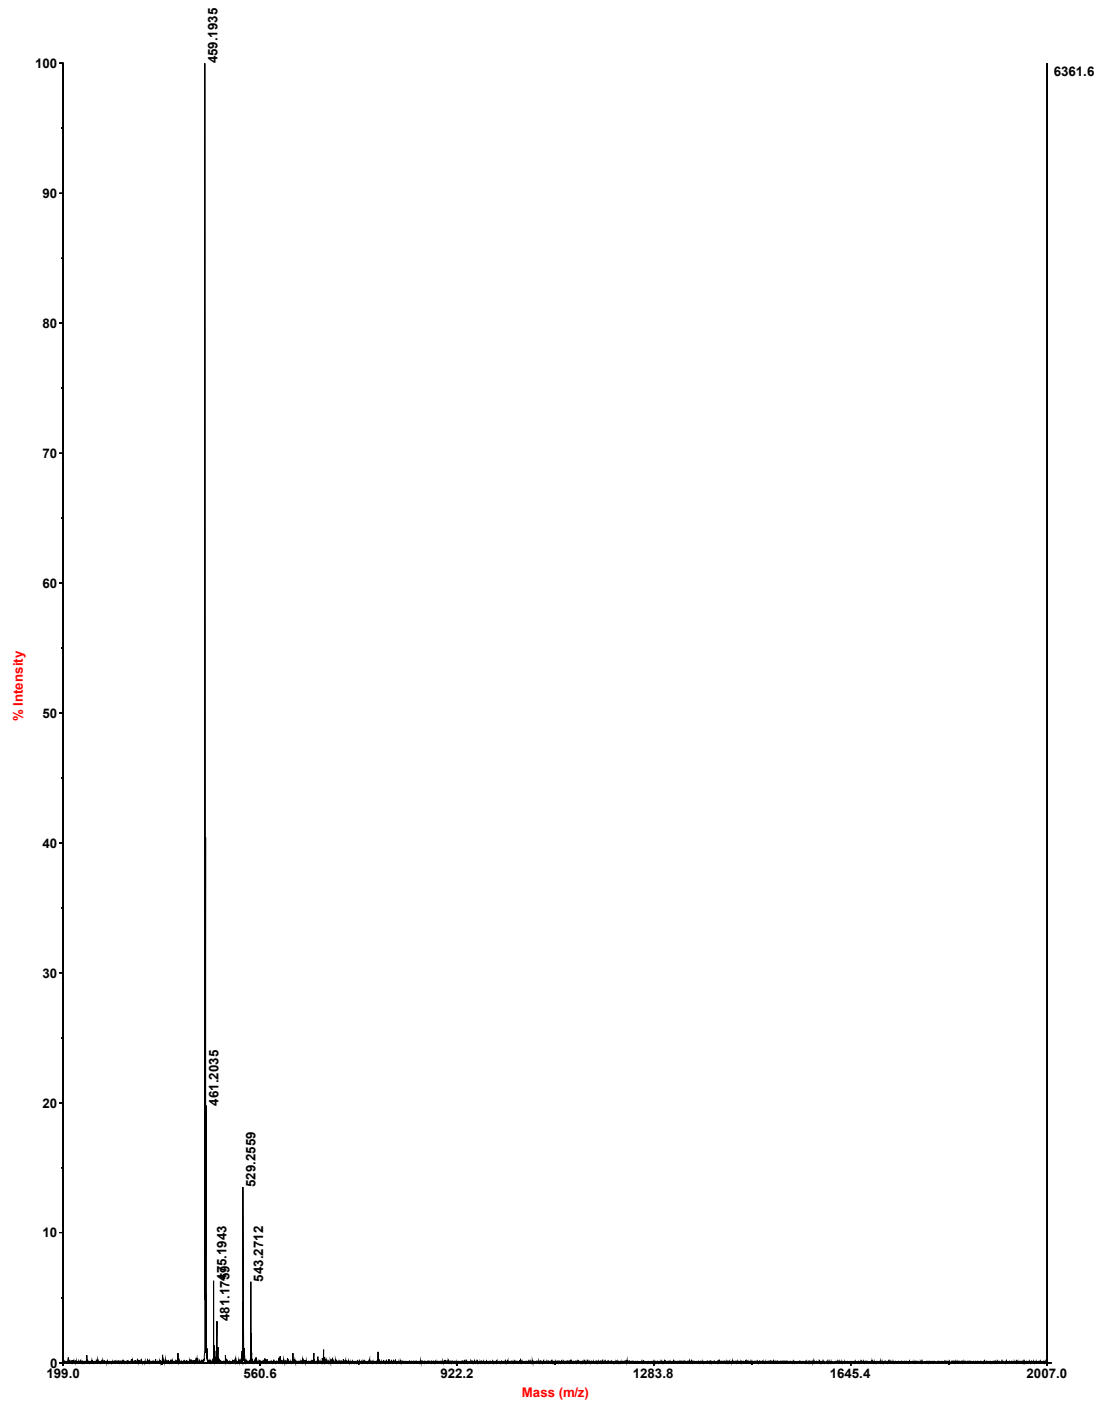

AH244 (1f) (Lys-C3-Ad).

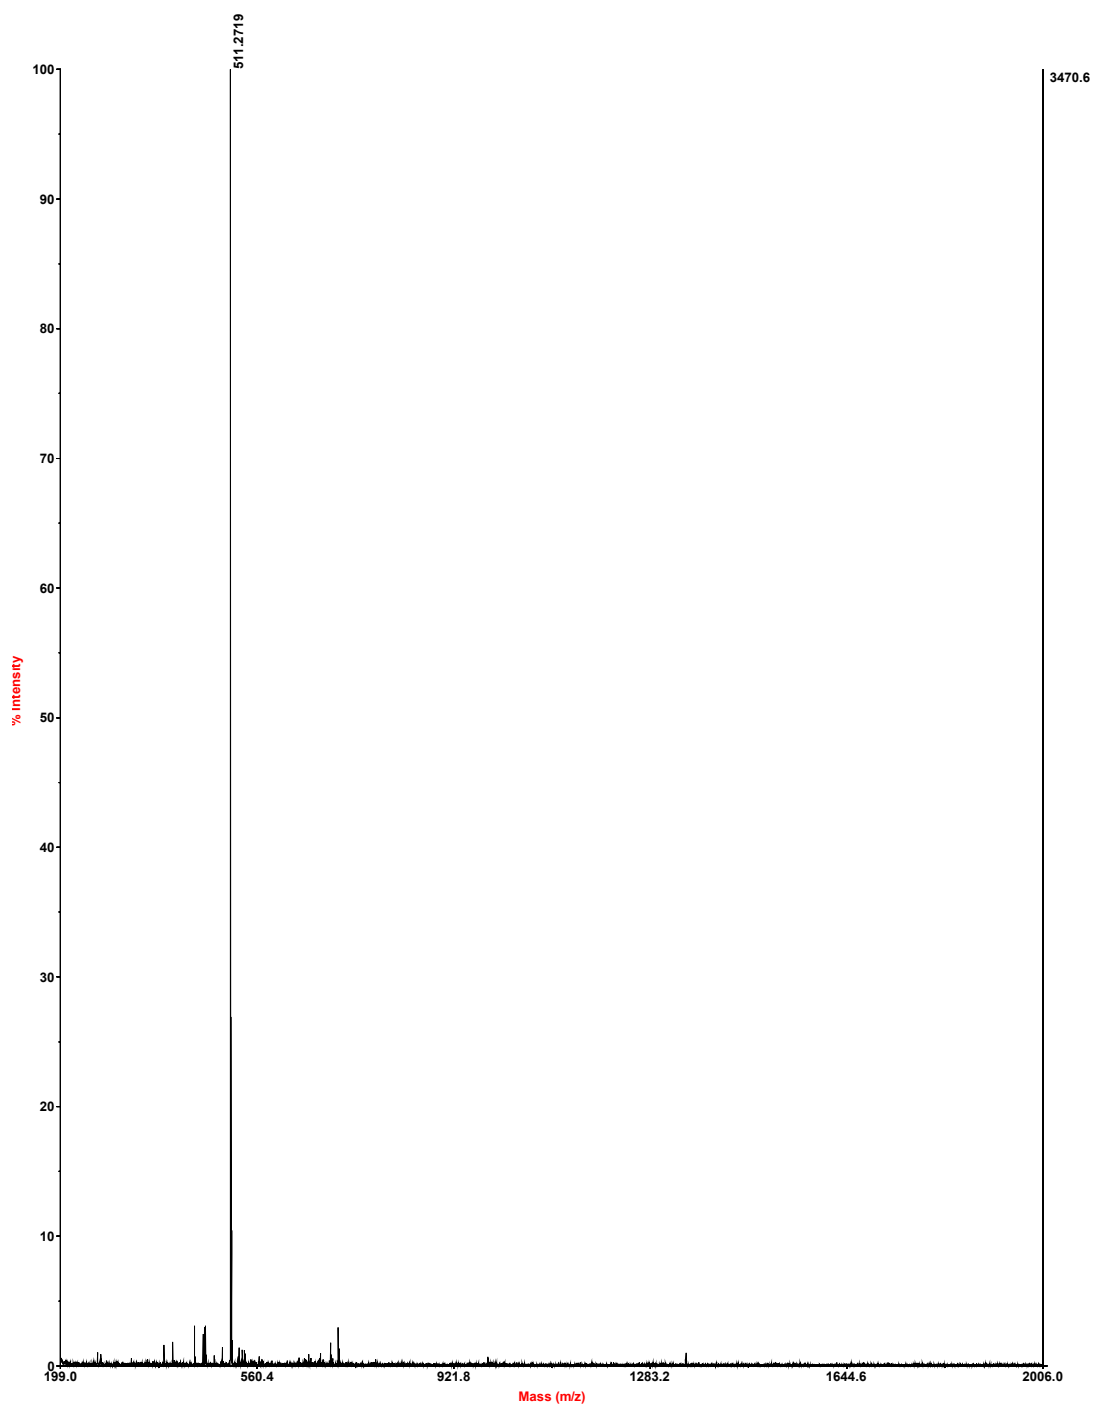

AH238 (1a) (Arg-C2-Ad).

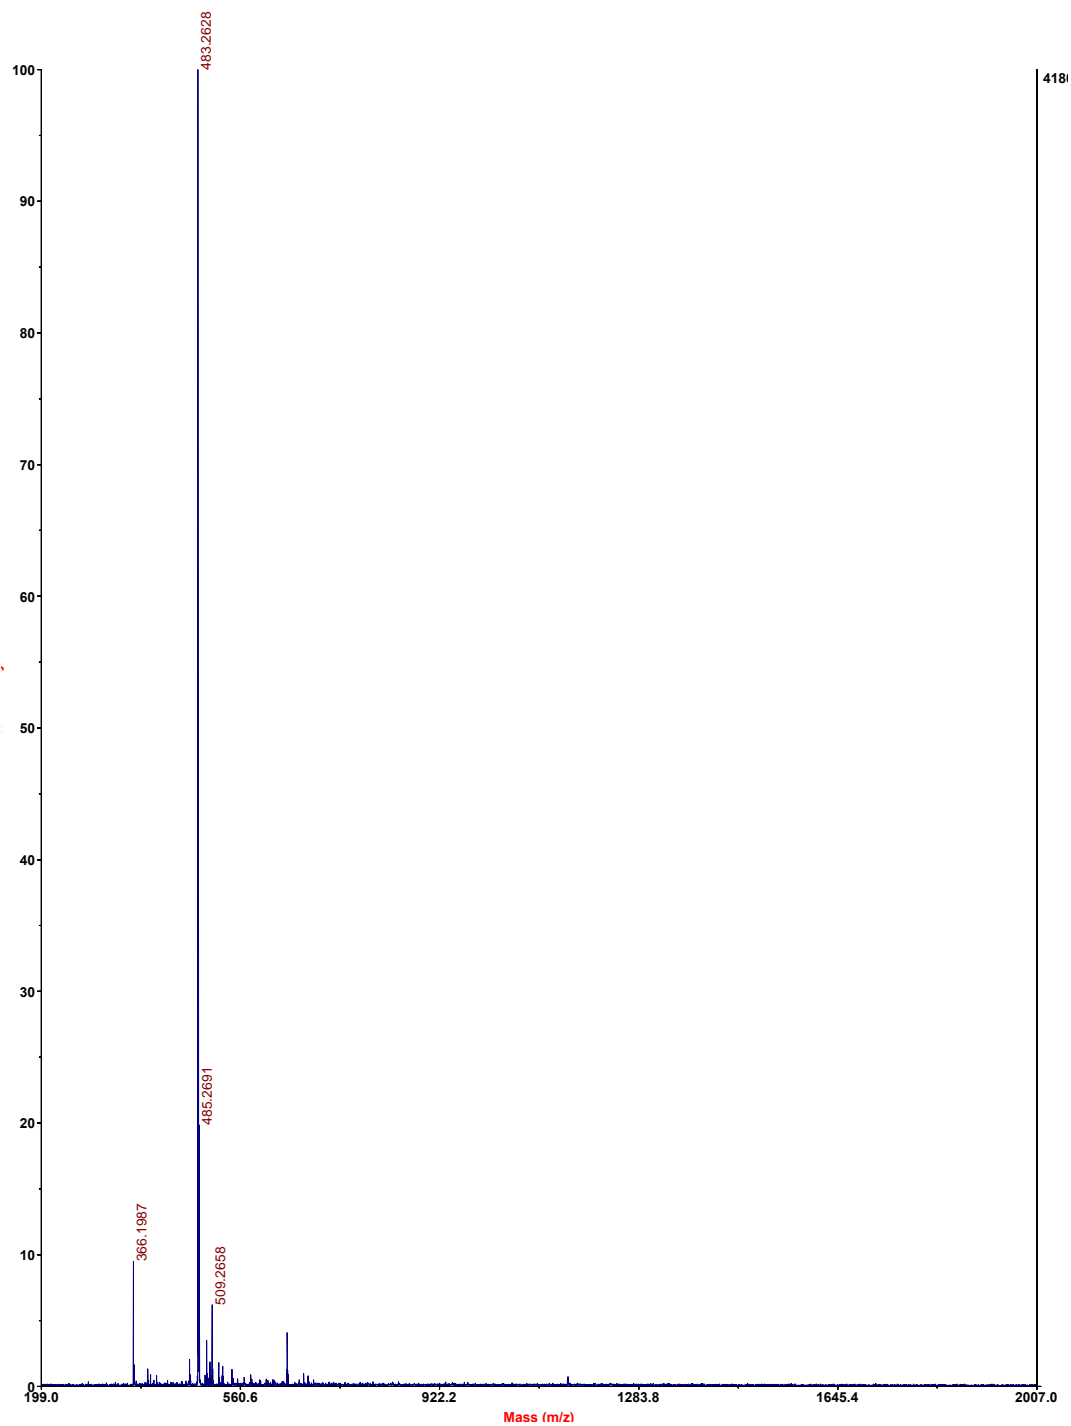



AH246 (1e) (Arg-C3-Ad).

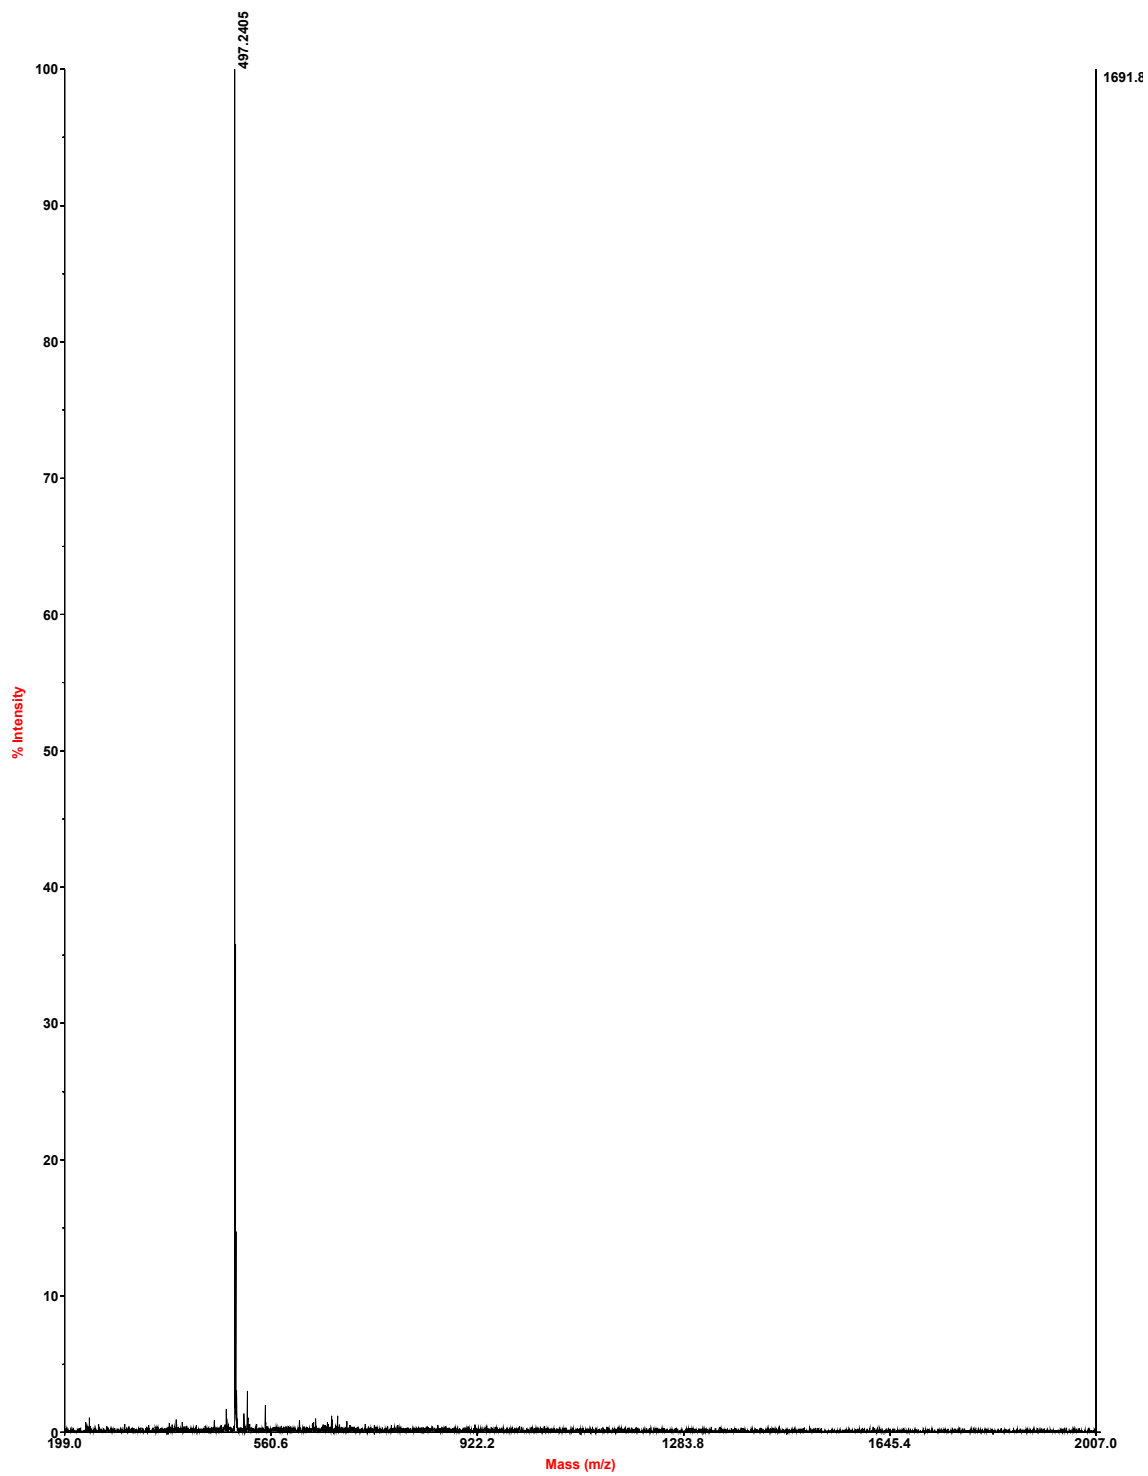

AH218 (1d) (RGK-C2-Ad).

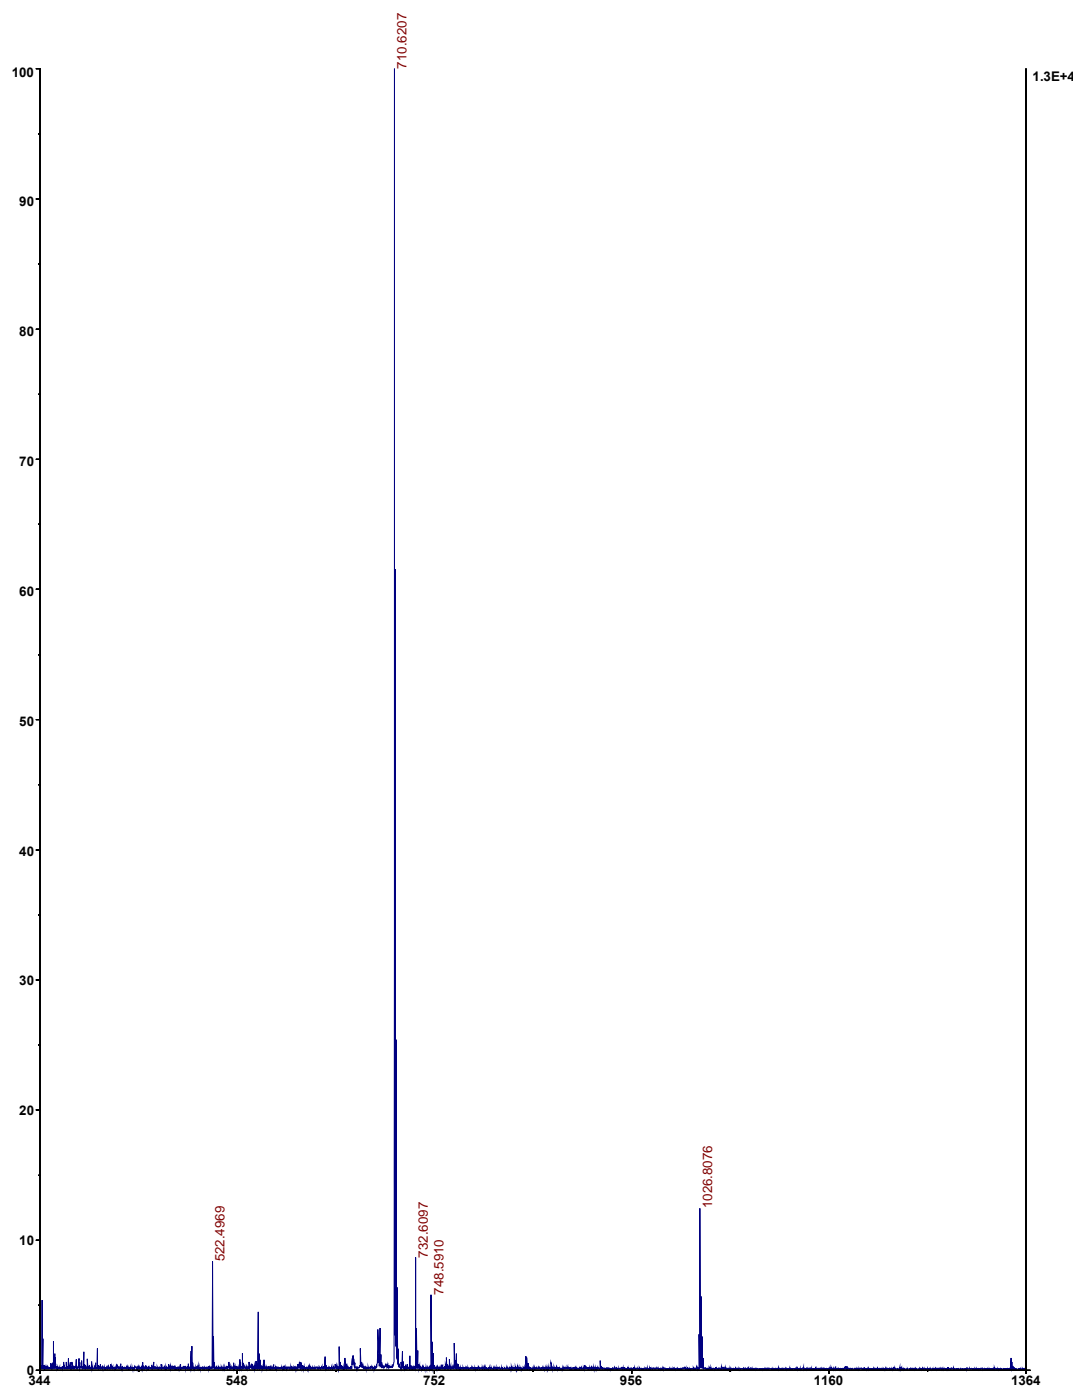

AH221 (1h) (RGK-C3-Ad).

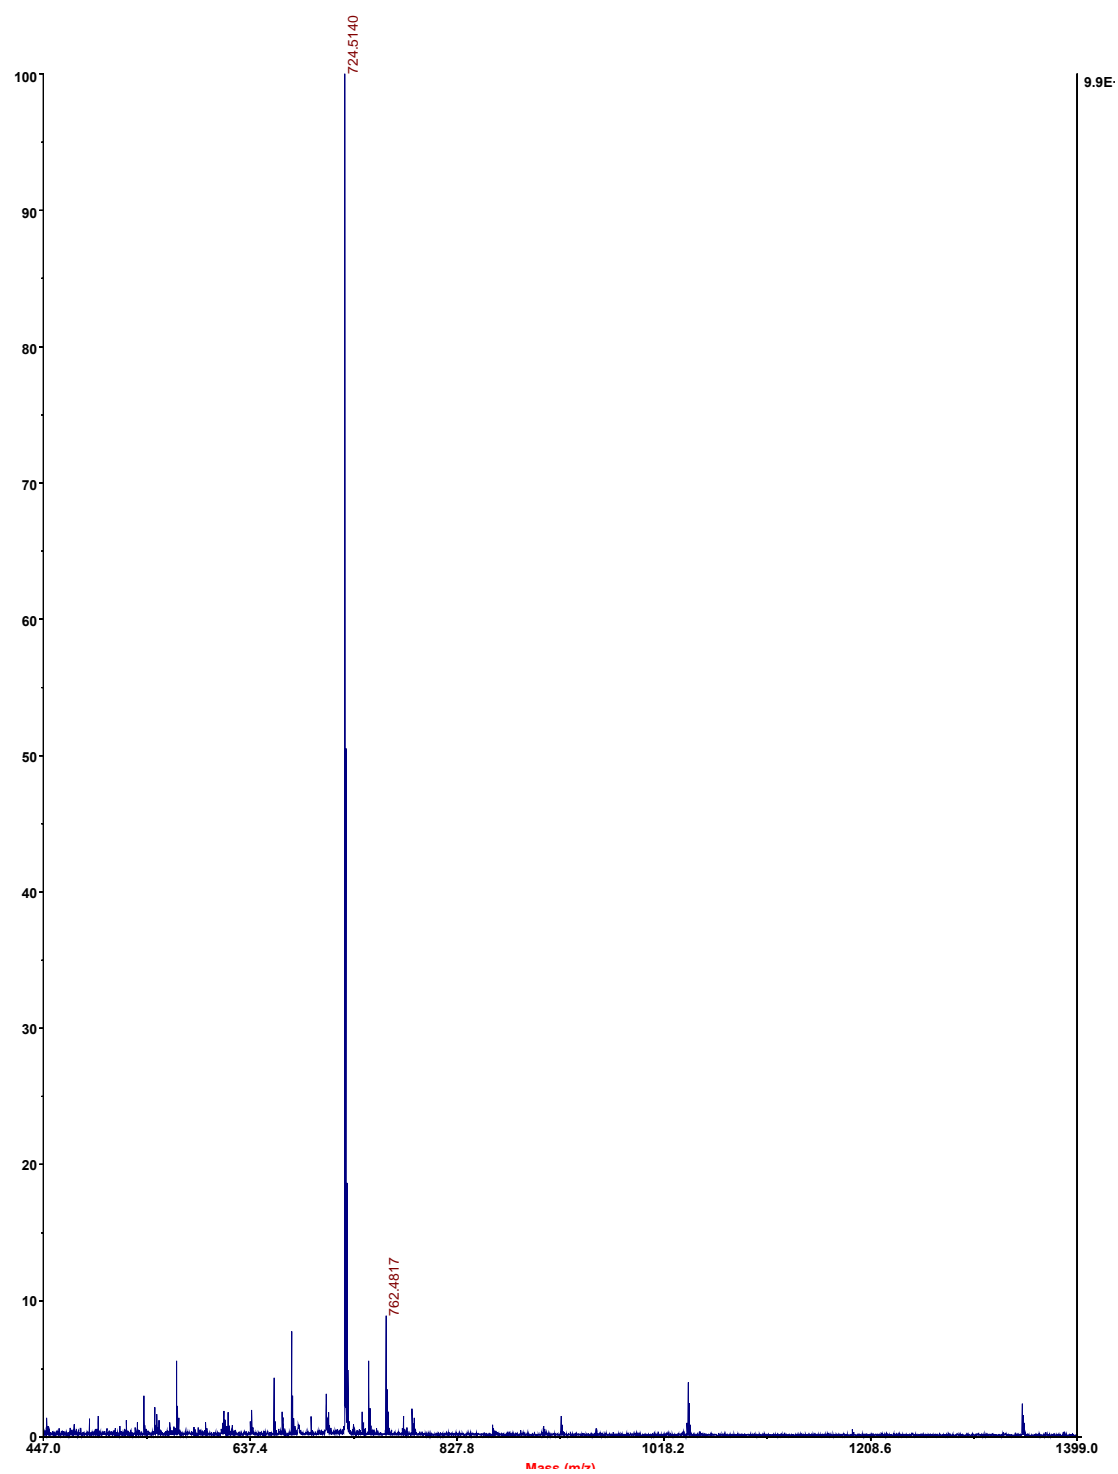

AH233 (1c) (RGR-C2-Ad).

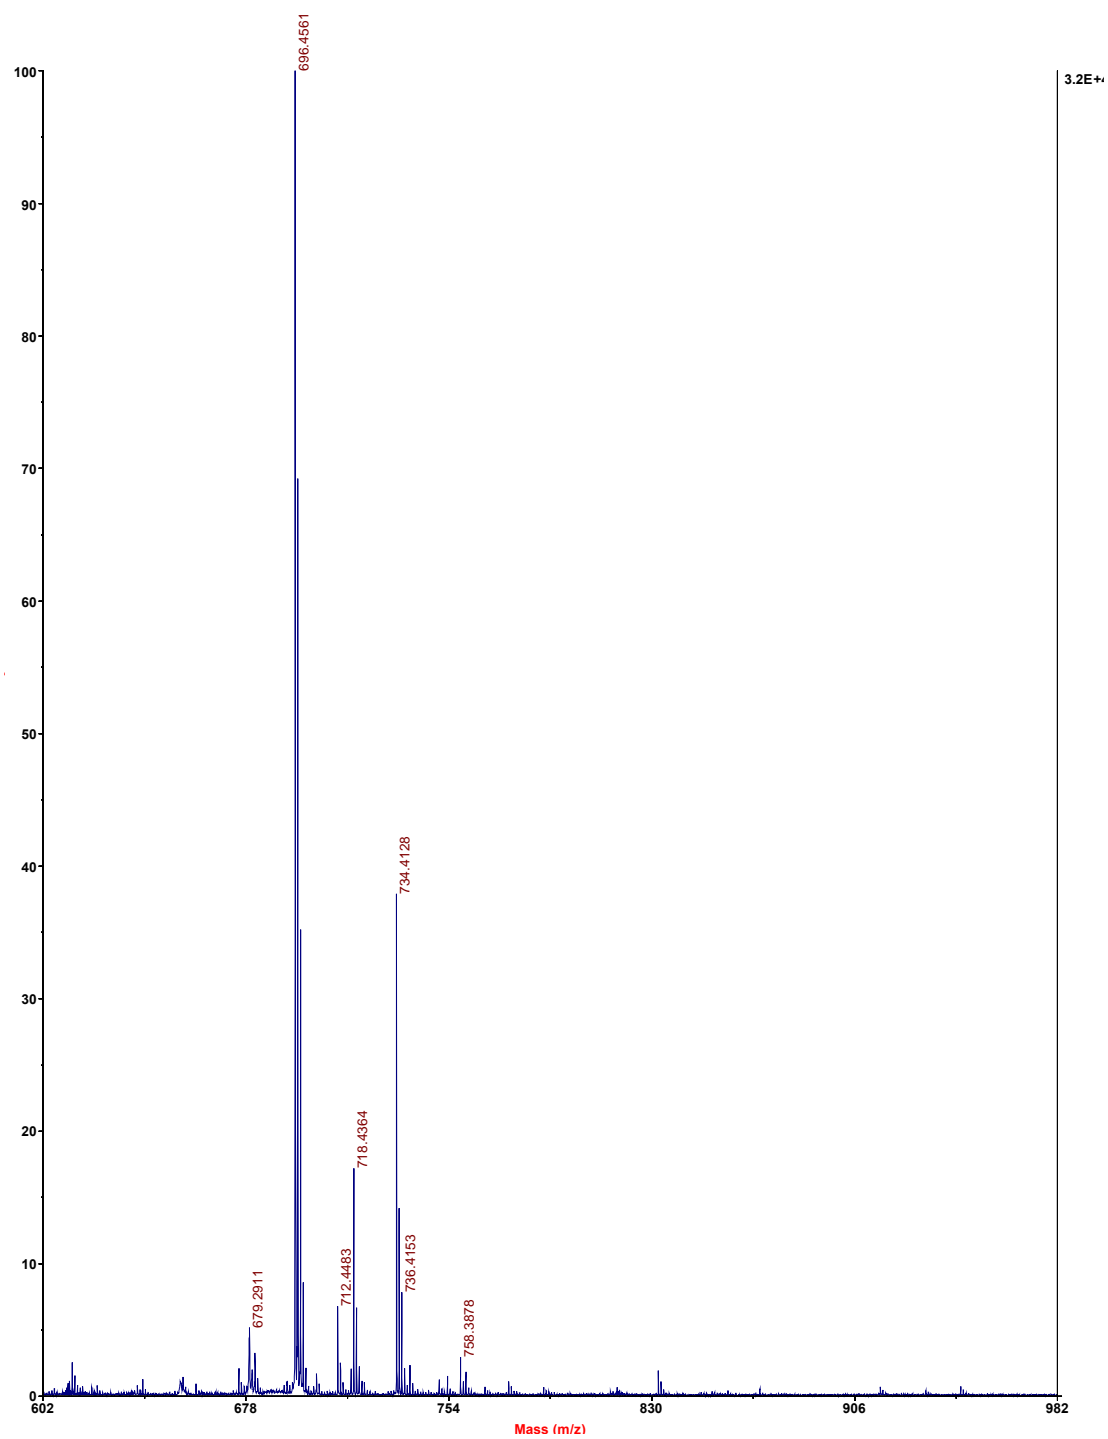

AH237 (1g) (RGR-C3-Ad).

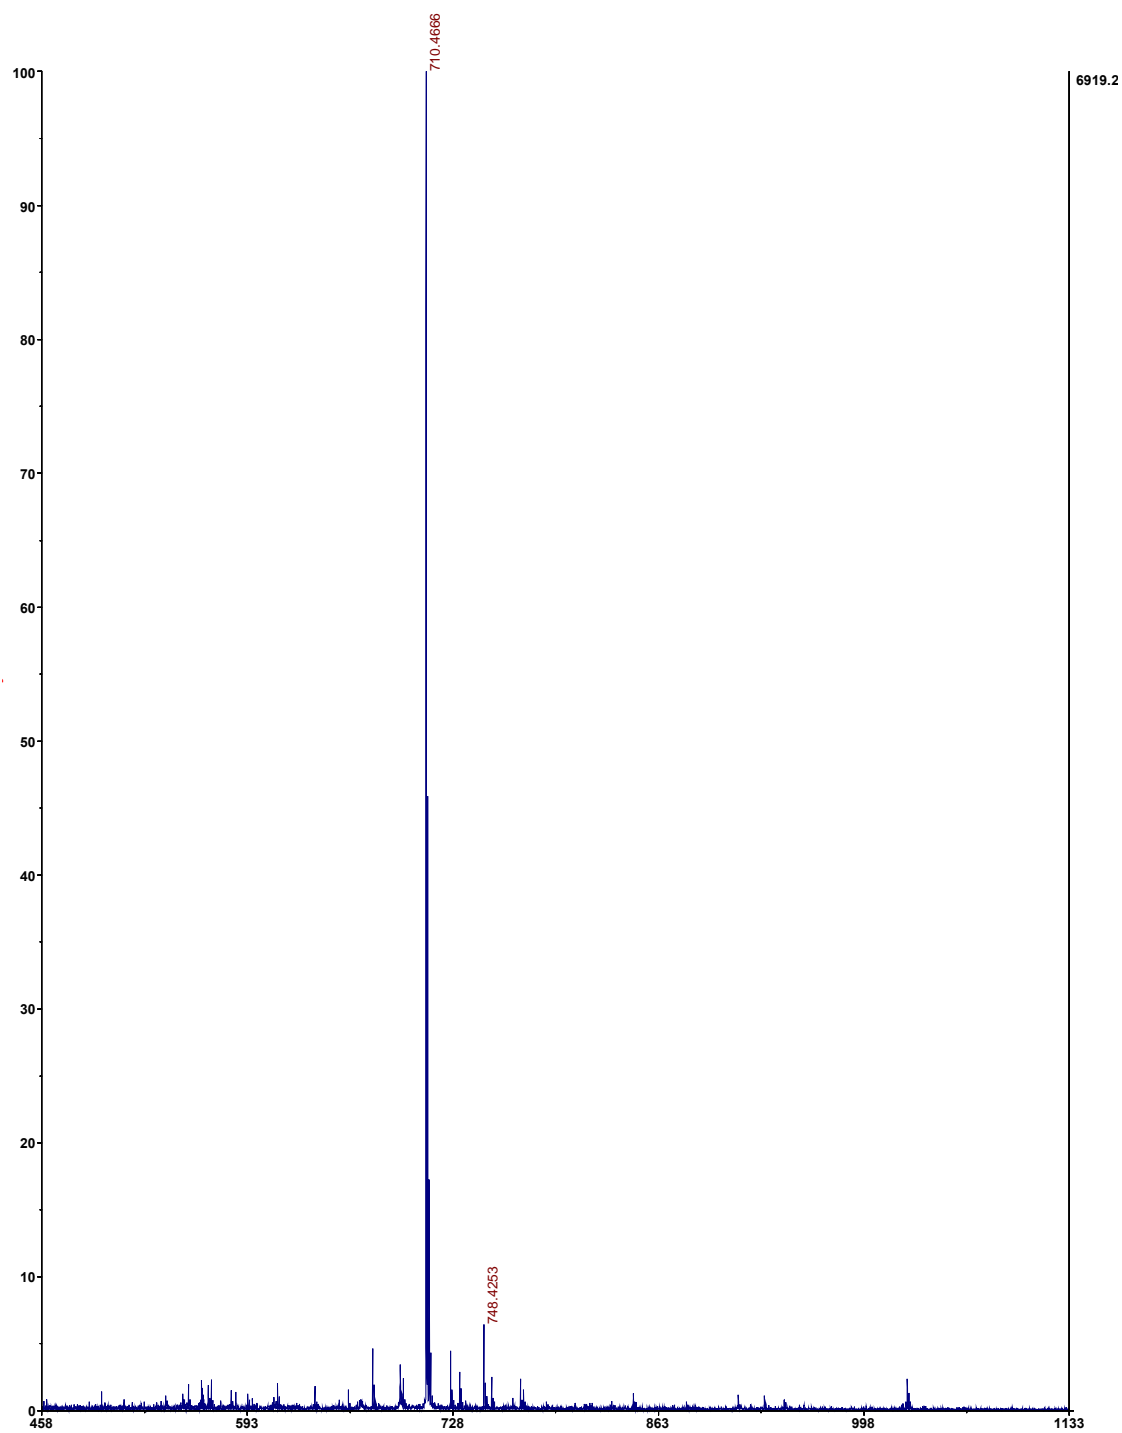

Supplement: mmc1.pdf [file mmc1.pdf]
